# Supplementary material for: Chromosome-level reference genome of the Siamese fighting fish Betta splendens, a model species for the study of aggression
Source: PubMed Central journal article supplement (PMC6251983; doi:10.1093/gigascience/giy087), 2018-07-11

# GigaScience

## High-quality reference genome of the Siamese fighting fish *Betta splendens*, a model species for the study of aggression --Manuscript Draft--

|                                                      |                                                                                                                                                                                                                                                                                                                                                                                                                                                                                                                                                                                                                                                                                                                                                                                                                                                                                                                                                                                                                                                                                                                                                                                                                                                                                                                                                                                                                                                                                                                                                                                                                                                                                                                                                                                                                                                  |                         |
|------------------------------------------------------|--------------------------------------------------------------------------------------------------------------------------------------------------------------------------------------------------------------------------------------------------------------------------------------------------------------------------------------------------------------------------------------------------------------------------------------------------------------------------------------------------------------------------------------------------------------------------------------------------------------------------------------------------------------------------------------------------------------------------------------------------------------------------------------------------------------------------------------------------------------------------------------------------------------------------------------------------------------------------------------------------------------------------------------------------------------------------------------------------------------------------------------------------------------------------------------------------------------------------------------------------------------------------------------------------------------------------------------------------------------------------------------------------------------------------------------------------------------------------------------------------------------------------------------------------------------------------------------------------------------------------------------------------------------------------------------------------------------------------------------------------------------------------------------------------------------------------------------------------|-------------------------|
| <b>Manuscript Number:</b>                            | GIGA-D-18-00046                                                                                                                                                                                                                                                                                                                                                                                                                                                                                                                                                                                                                                                                                                                                                                                                                                                                                                                                                                                                                                                                                                                                                                                                                                                                                                                                                                                                                                                                                                                                                                                                                                                                                                                                                                                                                                  |                         |
| <b>Full Title:</b>                                   | High-quality reference genome of the Siamese fighting fish <i>Betta splendens</i> , a model species for the study of aggression                                                                                                                                                                                                                                                                                                                                                                                                                                                                                                                                                                                                                                                                                                                                                                                                                                                                                                                                                                                                                                                                                                                                                                                                                                                                                                                                                                                                                                                                                                                                                                                                                                                                                                                  |                         |
| <b>Article Type:</b>                                 | Data Note                                                                                                                                                                                                                                                                                                                                                                                                                                                                                                                                                                                                                                                                                                                                                                                                                                                                                                                                                                                                                                                                                                                                                                                                                                                                                                                                                                                                                                                                                                                                                                                                                                                                                                                                                                                                                                        |                         |
| <b>Funding Information:</b>                          | Macau Science and Technology Development Fund (011/2014/A1)                                                                                                                                                                                                                                                                                                                                                                                                                                                                                                                                                                                                                                                                                                                                                                                                                                                                                                                                                                                                                                                                                                                                                                                                                                                                                                                                                                                                                                                                                                                                                                                                                                                                                                                                                                                      | dr. Simon Ming-Yuen Lee |
|                                                      | Shenzhen Municipal Government of China (JCYJ20151015162041454)                                                                                                                                                                                                                                                                                                                                                                                                                                                                                                                                                                                                                                                                                                                                                                                                                                                                                                                                                                                                                                                                                                                                                                                                                                                                                                                                                                                                                                                                                                                                                                                                                                                                                                                                                                                   | dr. Wenbin Chen         |
|                                                      | Shenzhen Municipal Government of China (JCYJ20150529150505656)                                                                                                                                                                                                                                                                                                                                                                                                                                                                                                                                                                                                                                                                                                                                                                                                                                                                                                                                                                                                                                                                                                                                                                                                                                                                                                                                                                                                                                                                                                                                                                                                                                                                                                                                                                                   | Dr. Xin Liu             |
| <b>Abstract:</b>                                     | <p><b>Background:</b> Siamese fighting fish <i>Betta splendens</i> are notorious for their aggressiveness and accordingly have been widely used to study aggression. However, the lack of a reference genome has so far limited the understanding of the genetic basis of aggression in this species. Here we present the first reference genome assembly of the Siamese fighting fish.</p> <p><b>Findings:</b> We first sequenced and de novo assembled a 465.24 Mb genome for the <i>B. splendens</i> variety Giant, with a weighted average (N50) scaffold size of 949.03 Kb and an N50 contig size of 19.01 Kb, covering 99.93% of the estimated genome size. To obtain a chromosome-level genome assembly, we constructed one Hi-C library and sequenced 69.7 Gb reads using the BGISEQ-500 platform. We anchored approximately 93% of the scaffold sequences into 21 chromosomes and evaluated the quality of our assembly using the high contact frequency heatmap and BUSCO. We also performed comparative chromosome analyses between <i>Oryzias latipes</i> and <i>B. splendens</i>, revealing a chromosome conservation evolution in <i>B. splendens</i>. We predicted a total of 23,202 genes assisted by RNA-seq data generated from brain, liver, muscle and heart tissues of Giant, and annotated 15% repetitive sequences in the genome. Additionally, we resequenced other five <i>B. splendens</i> varieties and detected ~3.4M single-nucleotide variations (SNVs) and 27,305 indels.</p> <p><b>Conclusions:</b> We provide the first chromosome-level genome for the Siamese fighting fish. The genome will lay a valuable foundation for future research on aggression in <i>B. splendens</i>.</p> <p><b>Keywords:</b> <i>Betta splendens</i>; fish genome; aggression; Hi-C; chromosomal genome assembly; resequencing</p> |                         |
| <b>Corresponding Author:</b>                         | Xin Liu, Ph.D.<br>BGI<br>CHINA                                                                                                                                                                                                                                                                                                                                                                                                                                                                                                                                                                                                                                                                                                                                                                                                                                                                                                                                                                                                                                                                                                                                                                                                                                                                                                                                                                                                                                                                                                                                                                                                                                                                                                                                                                                                                   |                         |
| <b>Corresponding Author Secondary Information:</b>   |                                                                                                                                                                                                                                                                                                                                                                                                                                                                                                                                                                                                                                                                                                                                                                                                                                                                                                                                                                                                                                                                                                                                                                                                                                                                                                                                                                                                                                                                                                                                                                                                                                                                                                                                                                                                                                                  |                         |
| <b>Corresponding Author's Institution:</b>           | BGI                                                                                                                                                                                                                                                                                                                                                                                                                                                                                                                                                                                                                                                                                                                                                                                                                                                                                                                                                                                                                                                                                                                                                                                                                                                                                                                                                                                                                                                                                                                                                                                                                                                                                                                                                                                                                                              |                         |
| <b>Corresponding Author's Secondary Institution:</b> |                                                                                                                                                                                                                                                                                                                                                                                                                                                                                                                                                                                                                                                                                                                                                                                                                                                                                                                                                                                                                                                                                                                                                                                                                                                                                                                                                                                                                                                                                                                                                                                                                                                                                                                                                                                                                                                  |                         |
| <b>First Author:</b>                                 | Xin Liu, Ph.D.                                                                                                                                                                                                                                                                                                                                                                                                                                                                                                                                                                                                                                                                                                                                                                                                                                                                                                                                                                                                                                                                                                                                                                                                                                                                                                                                                                                                                                                                                                                                                                                                                                                                                                                                                                                                                                   |                         |
| <b>First Author Secondary Information:</b>           |                                                                                                                                                                                                                                                                                                                                                                                                                                                                                                                                                                                                                                                                                                                                                                                                                                                                                                                                                                                                                                                                                                                                                                                                                                                                                                                                                                                                                                                                                                                                                                                                                                                                                                                                                                                                                                                  |                         |
| <b>Order of Authors:</b>                             | Xin Liu, Ph.D.                                                                                                                                                                                                                                                                                                                                                                                                                                                                                                                                                                                                                                                                                                                                                                                                                                                                                                                                                                                                                                                                                                                                                                                                                                                                                                                                                                                                                                                                                                                                                                                                                                                                                                                                                                                                                                   |                         |
|                                                      | Guangyi Fan                                                                                                                                                                                                                                                                                                                                                                                                                                                                                                                                                                                                                                                                                                                                                                                                                                                                                                                                                                                                                                                                                                                                                                                                                                                                                                                                                                                                                                                                                                                                                                                                                                                                                                                                                                                                                                      |                         |
|                                                      | Judy Chan                                                                                                                                                                                                                                                                                                                                                                                                                                                                                                                                                                                                                                                                                                                                                                                                                                                                                                                                                                                                                                                                                                                                                                                                                                                                                                                                                                                                                                                                                                                                                                                                                                                                                                                                                                                                                                        |                         |
|                                                      | Kailong Ma                                                                                                                                                                                                                                                                                                                                                                                                                                                                                                                                                                                                                                                                                                                                                                                                                                                                                                                                                                                                                                                                                                                                                                                                                                                                                                                                                                                                                                                                                                                                                                                                                                                                                                                                                                                                                                       |                         |

|                                                                                                                                                                                                                                                                                                                                                                                                                              |                     |
|------------------------------------------------------------------------------------------------------------------------------------------------------------------------------------------------------------------------------------------------------------------------------------------------------------------------------------------------------------------------------------------------------------------------------|---------------------|
|                                                                                                                                                                                                                                                                                                                                                                                                                              | Simon Ming-Yuen Lee |
|                                                                                                                                                                                                                                                                                                                                                                                                                              | Binrui Yang         |
|                                                                                                                                                                                                                                                                                                                                                                                                                              | He Zhang            |
|                                                                                                                                                                                                                                                                                                                                                                                                                              | Xianwei Yang        |
|                                                                                                                                                                                                                                                                                                                                                                                                                              | Chengcheng Shi      |
|                                                                                                                                                                                                                                                                                                                                                                                                                              | Henry Law           |
|                                                                                                                                                                                                                                                                                                                                                                                                                              | Zhitao Ren          |
|                                                                                                                                                                                                                                                                                                                                                                                                                              | Qiwu Xu             |
|                                                                                                                                                                                                                                                                                                                                                                                                                              | Qun Liu             |
|                                                                                                                                                                                                                                                                                                                                                                                                                              | Jiahao Wang         |
|                                                                                                                                                                                                                                                                                                                                                                                                                              | Wenbin Chen         |
|                                                                                                                                                                                                                                                                                                                                                                                                                              | Libin Shao          |
|                                                                                                                                                                                                                                                                                                                                                                                                                              | David Gonçalves     |
|                                                                                                                                                                                                                                                                                                                                                                                                                              | Andreia Ramos       |
|                                                                                                                                                                                                                                                                                                                                                                                                                              | Sara Cardoso        |
|                                                                                                                                                                                                                                                                                                                                                                                                                              | Min Guo             |
|                                                                                                                                                                                                                                                                                                                                                                                                                              | Jing Cai            |
|                                                                                                                                                                                                                                                                                                                                                                                                                              | Xun Xu              |
|                                                                                                                                                                                                                                                                                                                                                                                                                              | Jian Wang           |
|                                                                                                                                                                                                                                                                                                                                                                                                                              | Huanming Yang       |
|                                                                                                                                                                                                                                                                                                                                                                                                                              | Yitao Wang          |
| <b>Order of Authors Secondary Information:</b>                                                                                                                                                                                                                                                                                                                                                                               |                     |
| <b>Opposed Reviewers:</b>                                                                                                                                                                                                                                                                                                                                                                                                    |                     |
| <b>Additional Information:</b>                                                                                                                                                                                                                                                                                                                                                                                               |                     |
| <b>Question</b>                                                                                                                                                                                                                                                                                                                                                                                                              | <b>Response</b>     |
| Are you submitting this manuscript to a special series or article collection?                                                                                                                                                                                                                                                                                                                                                | No                  |
| <b>Experimental design and statistics</b><br><br>Full details of the experimental design and statistical methods used should be given in the Methods section, as detailed in our <a href="#">Minimum Standards Reporting Checklist</a> . Information essential to interpreting the data presented should be made available in the figure legends.<br><br>Have you included all the information requested in your manuscript? | Yes                 |
| <b>Resources</b><br><br>A description of all resources used,                                                                                                                                                                                                                                                                                                                                                                 | Yes                 |

|                                                                                                                                                                                                                                                                                                                                                                                                                                                                                                                                                         |            |
|---------------------------------------------------------------------------------------------------------------------------------------------------------------------------------------------------------------------------------------------------------------------------------------------------------------------------------------------------------------------------------------------------------------------------------------------------------------------------------------------------------------------------------------------------------|------------|
| <p>including antibodies, cell lines, animals and software tools, with enough information to allow them to be uniquely identified, should be included in the Methods section. Authors are strongly encouraged to cite <a href="#">Research Resource Identifiers</a> (RRIDs) for antibodies, model organisms and tools, where possible.</p> <p>Have you included the information requested as detailed in our <a href="#">Minimum Standards Reporting Checklist</a>?</p>                                                                                  |            |
| <p><b>Availability of data and materials</b></p> <p>All datasets and code on which the conclusions of the paper rely must be either included in your submission or deposited in <a href="#">publicly available repositories</a> (where available and ethically appropriate), referencing such data using a unique identifier in the references and in the “Availability of Data and Materials” section of your manuscript.</p> <p>Have you have met the above requirement as detailed in our <a href="#">Minimum Standards Reporting Checklist</a>?</p> | <p>Yes</p> |

# High-quality reference genome of the Siamese fighting fish *Betta splendens*, a model species for the study of aggression

Guangyi Fan<sup>1,2,3,4,\*</sup>, Judy Chan<sup>1,\*</sup>, Kailong Ma<sup>3,4,\*</sup>, Simon Ming-Yuen Lee<sup>1,\*†</sup>, Binrui Yang<sup>1</sup>, He Zhang<sup>2,3,4</sup>, Xianwei Yang<sup>2,3,4</sup>, Chengcheng Shi<sup>2,3,4</sup>, Henry Law<sup>1</sup>, Zhitao Ren<sup>1</sup>, Qiwu Xu<sup>2,3,4</sup>, Qun Liu<sup>2,3,4</sup>, Jiahao Wang<sup>2,3,4</sup>, Wenbin Chen<sup>3,4</sup>, Libin Shao<sup>2,3,4</sup>, David Gonçalves<sup>6</sup>, Andreia Ramos<sup>6</sup>, Sara D. Cardoso<sup>7</sup>, Min Guo<sup>1</sup>, Jing Cai<sup>1</sup>, Xun Xu<sup>2,3,4</sup>, Jian Wang<sup>3,5</sup>, Huanming Yang<sup>3,5</sup>, Xin Liu<sup>2,3,4,†</sup>, Yitao Wang<sup>1,†</sup>

<sup>1</sup>State Key Laboratory of Quality Research in Chinese Medicine, Institute of Chinese Medical Sciences, University of Macau, Macao, China.

<sup>2</sup>BGI-Qingdao, Qingdao 266500, China

<sup>3</sup>BGI-Shenzhen, Shenzhen 518083, China

<sup>4</sup>China National GeneBank, BGI-Shenzhen, Shenzhen 518120, China

<sup>5</sup>James D. Watson Institute of Genome Sciences, Hangzhou 310058, China

<sup>6</sup>Institute of Science and Environment, University of Saint Joseph, Macao SAR, China.

<sup>7</sup>Instituto Gulbenkian de Ciência, Oeiras, Portugal

\*These authors contributed equally to this work.

†Correspondence authors: Yitao Wang ([ytwang@umac.mo](mailto:ytwang@umac.mo)), Simon Ming-Yuen Lee ([simonlee@umac.mo](mailto:simonlee@umac.mo)) and Xin Liu ([liuxin@genomics.cn](mailto:liuxin@genomics.cn)).

## Abstract

**Background:** Siamese fighting fish *Betta splendens* are notorious for their aggressiveness and accordingly have been widely used to study aggression. However, the lack of a reference genome has so far limited the understanding of the genetic basis of aggression in this species. Here we present the first reference genome assembly of the Siamese fighting fish.

**Findings:** We first sequenced and *de novo* assembled a 465.24 Mb genome for the *B. splendens* variety Giant, with a weighted average (N50) scaffold size of 949.03 Kb and an N50 contig size of 19.01 Kb, covering 99.93% of the estimated genome size. To obtain a chromosome-level genome assembly, we constructed one Hi-C library and

1  
2  
3  
4  
5  
6  
7  
8  
9  
10  
11  
12  
13  
14  
15  
16  
17  
18  
19  
20  
21  
22  
23  
24  
25  
26  
27  
28  
29  
30  
31  
32  
33  
34  
35  
36  
37  
38  
39  
40  
41  
42  
43  
44  
45  
46  
47  
48  
49  
50  
51  
52  
53  
54  
55  
56  
57  
58  
59  
60  
61  
62  
63  
64  
65

31 sequenced 75.24 Gb reads using the BGISEQ-500 platform. We anchored approximately  
32 93% of the scaffold sequences into 21 chromosomes and evaluated the quality of our  
33 assembly using the high contact frequency heatmap and BUSCO. We also performed  
34 comparative chromosome analyses between *Oryzias latipes* and *B. splendens*, revealing a  
35 chromosome conservation evolution in *B. splendens*. We predicted a total of 23,202  
36 genes assisted by RNA-seq data generated from brain, liver, muscle and heart tissues of  
37 Giant, and annotated 15% repetitive sequences in the genome. Additionally, we  
38 resequenced other five *B. splendens* varieties and detected ~3.4M single-nucleotide  
39 variations (SNVs) and 27,305 indels.

40 **Conclusions:** We provide the first chromosome-level genome for the Siamese fighting  
41 fish. The genome will lay a valuable foundation for future research on aggression in *B.*  
42 *splendens*.

43  
44 **Keywords:** *Betta splendens*; fish genome; aggression; Hi-C; chromosomal genome  
45 assembly; resequencing

1  
2  
3  
4 **47 Data Description**

5  
6 48 Males of the Siamese fighting fish *Betta splendens* are notorious for their aggressiveness.  
7  
8 49 In nature, males establish and vigorously defend territories where they construct a bubble  
9  
10 50 nest to hold fertilized eggs. In laboratory settings, males will readily attack an opponent,  
11  
12 51 their mirror image, physical models of conspecifics or video images of other males, and  
13  
14 52 accordingly the species has been widely used to study the neurobiological mechanisms of  
15  
16 53 aggression. However, the lack of a reference genome limited so far studies on the genetic  
17  
18 54 basis of aggression in *B. splendens*. The species is also one of the most relevant for the  
19  
20 55 ornamental fish trade as it is easy to keep and reproduce in captivity and throughout its  
21  
22 56 long domestication period many varieties have been selected for their exuberant fins and  
23  
24 57 colors, size or aggressive behavior. Here, we sequenced the genome of *B. splendens* to  
25  
26 58 provide the genomic foundation for future research on aggression and development of  
27  
28 59 genomic tools.

29 60  
30 **61 Sampling and sequencing**

31  
32 62 We purchased five different varieties of adult male Siamese fighting fish including Giant,  
33  
34 63 Half-moon (HM), Half-moon plakat (HMPK), Fighter, and Elephant Ear (EE) from HK  
35  
36 64 supplier TC Northern Betta (**Supplementary Fig. 1**). We constructed and sequenced five  
37  
38 65 DNA libraries for the *B. splendens* variety Giant, including three short insert size libraries  
39  
40 66 and three mate-pair libraries (**Supplementary Table 1**), and five RNA-seq libraries  
41  
42 67 (**Supplementary Table 2**) using the HiSeq 2000 sequencing platform. One Hi-C library  
43  
44 68 for Giant was also constructed and sequenced using the BGISEQ-500 sequencing  
45  
46 69 platform, yielding 75.24 Gb of reads. Additionally, we sequenced five short insert size  
47  
48 70 DNA libraries for the other five *B. splendens* varieties.

49 71  
50 **72 Genome assembly**

51  
52 73 We obtained 52.34 Gb of clean reads using SOAPnuke<sup>1</sup> with strict parameters, including  
53  
54 74 removal of low-quality reads, adapter contamination and PCR duplicates. Then, we  
55  
56 75 performed the *de novo* assembly of the Giant high-quality reads using the SOAPdenovo<sup>2</sup>  
57  
58 76 assembler. For the genome assembly, the short insert size libraries were used to construct  
59  
60 77 the contig sequences and the mate-paired libraries were used to link the scaffolds. We

1  
2  
3  
4  
5  
6  
7  
8  
9  
10  
11  
12  
13  
14  
15  
16  
17  
18  
19  
20  
21  
22  
23  
24  
25  
26  
27  
28  
29  
30  
31  
32  
33  
34  
35  
36  
37  
38  
39  
40  
41  
42  
43  
44  
45  
46  
47  
48  
49  
50  
51  
52  
53  
54  
55  
56  
57  
58  
59  
60  
61  
62  
63  
64  
65

78 filled the gaps within the scaffolds using Gapcloser. We obtained a genome with a size of  
79 465.24 Mb, with an N50 scaffold size of 949.03 Kb and an N50 contig size of 19.01 Kb  
80 (**Table 1**), covering 99.93% of the estimated genome size of 465.55 Mb using kmer  
81 analysis (**Supplementary Table 3** and **Supplementary Fig. 2**). To construct the  
82 reference genome at the chromosome-level, we used a MBOI endonuclease to cut the  
83 DNA, and constructed a Hi-C library based on a previous protocol<sup>3</sup>. We sequenced 75.24  
84 Gb of data using the BGISEQ-500 sequencing platform, and obtained 34.5Gb valid reads  
85 (~45.8%) that could be used to anchor the scaffolds into chromosomes after quality  
86 control using the HiC-Pro pipeline<sup>4</sup> (**Supplementary Fig. 3-7**). Lastly, we constructed 21  
87 chromosomes that occupied 95.3% of the genome (**Fig. 1, Table 1** and **Supplementary**  
88 **Table 4**) using Juicer<sup>5</sup> and 3D-dna pipeline<sup>6</sup> based on the draft genome assembly. To  
89 evaluate the quality of the assembly, we found 95.4% of BUSCO genes that could be  
90 completely covered by our genome (**Table 2**) and approximately 98% of the transcripts  
91 assembled from four RNA-seq data could be aligned against the genome with more than  
92 90% coverage, revealing the high quality of the assembly (**Supplementary Table 5**).

93  
94 **Genome annotation**

95 We annotated the repetitive sequences by combining *de novo*- and homolog-based  
96 approaches. We firstly used LTR-FINDER<sup>7</sup> and RepeatModeler to construct a repetitive  
97 sequence library, and then used RepeatMasker<sup>8</sup> to classify these repeat sequences. We  
98 also detected repetitive sequences using RepeatMasker and ProteinMasker based on the  
99 Repbase library<sup>9</sup>. We identified a total of 15.12% transposable elements in the genome  
100 (**Supplementary Table 6**).

101 For the protein-coding prediction we combined several approaches: 1) gene model  
102 prediction using Augustus<sup>10</sup> and GENSCAN<sup>11</sup>; 2) gene prediction using GeneWise<sup>12</sup>  
103 based on the alignment results of protein sequences of other published species against our  
104 assembly; and 3) four RNA-seq data samples were used to assist in predicting the gene  
105 structure with Cufflinks<sup>13</sup>. Lastly, we integrated all of this evidence into a non-  
106 redundancy gene set using GLEAN<sup>14</sup>. The final gene set contained 23,202 genes  
107 (**Supplementary Table 7**), close to the number for *Oryzias latipes*<sup>15</sup> (24,674) and slightly  
108 less than that for *Danio rerio*<sup>16</sup> (26,046). We identified 90% of the 2,586 BUSCO gene

1  
2  
3  
4 109 models to be complete in the gene set (**Table 2**), indicating the high-quality assembly and  
5  
6 110 annotation.

7  
8 111

### 9 112 **Comparative genomic analysis**

10 113 We compared the fighting fish genome with other species, both at the whole genome- and  
11  
12 114 gene-level. All of the 21 chromosomes assembled for the fighting fish could be matched  
13  
14 115 to chromosomes of *Oryzias latipes* with a mean coverage ratio of 75.3%. From these, 18  
15  
16 116 chromosomes had a single hit to one chromosome of *O. latipes*, and 3 chromosomes (1,  
17  
18 117 19 and 21) had a hit in two chromosomes of *O. latipes* (**Fig. 2** and **Supplementary Table**  
19  
20 118 **8**), indicating conservative evolution for most of chromosomes, as well as several  
21  
22 119 chromosome reshuffling events between these two species. Furthermore, from the gene  
23  
24 120 set level, KO (KEGG Orthology) terms of animals from 109 different species were  
25  
26 121 counted and compared with the fighting fish gene set using the KEGG database<sup>17</sup>  
27  
28 122 (version 79). There were five KO terms notably expanded in fighting fish compared with  
29  
30 123 all other animals, including 147 NACHT, LRR and PYD domains-containing protein 3  
31  
32 124 (*NLRP3*, K12800), 86 tripartite motif-containing protein 47 (*TRIM47*, K12023), 43  
33  
34 125 chloride channel 7 (*CLCN7*, K05016), 29 arginine vasopressin receptor 2 (*AVPR2*,  
35  
36 126 K04228) and 17 maltase-glucoamylase (*MGAM*, K12047) (**Fig. 3**). *NLRP3* has two  
37  
38 127 prominent expansions, corresponding to clade 1, containing 56 genes, and clade2,  
39  
40 128 containing 79 genes, whereas other fish species in these two clades have less than three  
41  
42 129 gene copies (**Fig. 4**). *NLRP3* encodes a pyrin-like protein containing a pyrin domain, a  
43  
44 130 nucleotide-binding site (NBS) domain, and a leucine-rich repeat (LRR) motif, and plays a  
45  
46 131 role in the regulation of inflammation, the immune response, and apoptosis<sup>18</sup>.

47 132

### 48 133 **Resequencing**

49  
50 134 To evaluate the genetic diversity among the four varieties of *Betta splendens*, we called  
51  
52 135 the SNVs (single-nucleotide variations) and Indels (insertions and deletions) based on the  
53  
54 136 read alignment result using Giant assembly as a reference. We obtained 70.25 Gb of  
55  
56 137 clean reads filtered from 79.18 Gb of raw reads (**Supplementary Table 9**). We used  
57  
58 138 BWA<sup>19</sup> (v0.6.2) to align all the re-sequencing data to the reference genome and the  
59  
60 139 UnifiedGenotyper in Genome Analysis Toolkit (GATK<sup>20</sup>, v2.8.1) to call variations. In  
61  
62  
63  
64  
65



1  
2  
3  
4 140 total, we detected approximately 3.4 M SNVs and 27,305 indels, which will provide  
5  
6 141 abundant genetic polymorphism for use in future research and applications. Moreover,  
7  
8 142 we found that the cluster result was in accordance with the behavior shown by each *B.*  
9  
10 143 *splendens* variety, by constructing a phylogenetic tree and performing a PCA analysis  
11  
12 144 (Supplementary Fig. 8).

13  
14 145

### 15 146 **Availability of data**

16  
17 147 We have deposited the data into the GenBank under the BioProject number  
18  
19 148 PRJNA416843.

20  
21 149

### 22 150 **Abbreviations**

23  
24  
25 151 bp: base pair; Gb: gigabases; Kb: kilobases; KO: KEGG Orthology; M: million; Mb:  
26  
27 152 megabases; PCA: principal component analysis; SNV: single-nucleotide variation

28  
29 153

### 30 154 **Acknowledgements**

31  
32  
33 155 We thank the Macau Science and Technology Development Fund for financial support  
34  
35 156 (project 011/2014/A1), and Shenzhen Municipal Government of  
36  
37 157 China(JCYJ20151015162041454 to W.C. and JCYJ20150529150505656 to X.L.).

38  
39 158

40  
41 159

### 42 160 **Authors contributions**

43  
44 161 G.F., S.L. and J.C. conceived the project. G.F., X.L. and J.C. supervised the research.  
45  
46 162 H.Z., C.S. and X.Y. conceived and designed the experiments. K.M., X.L. and B.Y.  
47  
48 163 performed genome assembly and gene annotation. H.L., Z.R., Q.L. and Q.X. prepared the  
49  
50 164 fighting fish sample. Jiahao.W., W.C., X.X. and L.S. performed sequencing. A.R., M.G.,  
51  
52 165 Jing.C., H.Y. and J.W. performed comparative genomic analysis. G.F., S.C., Y. W. and  
53  
54 166 D.G. revised the paper. K.M. and X.Y. performed data accession.

55  
56 167

### 57 168 **Tables**

58  
59 169 **Table 1.** Statistics of the assembly using SOAP*denovo* and Hi-C data.

| Type                | Scaffold<br>Original | Contig<br>Original | Scaffold<br>(Hi-C) | Contig<br>(Hi-C) |
|---------------------|----------------------|--------------------|--------------------|------------------|
| Total Number        | 92,886               | 138,929            | 3,057              | 48,943           |
| Total length (bp)   | 465,240,853          | 421,527,246        | 452,537,980        | 409,013,355      |
| Average length (bp) | 5008.73              | 3034.12            | 19,754,490         | 19,674           |
| N50 Length (bp)     | 949,032              | 19,014             | 35,205,731         | 189,132          |
| N90 Length (bp)     | 59,769               | 3,504              | 14,840,089         | 4,434            |

170

171 **Table 2.** Evaluation results of the genome and gene set using BUSCO.

|                      | Genome |                | Genes  |                |
|----------------------|--------|----------------|--------|----------------|
|                      | Number | Percentage (%) | Number | Percentage (%) |
| Complete             | 2,466  | 95.4           | 2,327  | 90.0           |
| Single-copy complete | 2,422  | 93.7           | 2,254  | 87.2           |
| Duplicated complete  | 44     | 1.7            | 73     | 2.8            |
| Fragmented           | 69     | 2.7            | 204    | 7.9            |
| Missing              | 51     | 1.9            | 55     | 2.1            |
| Total                | 2,586  | -              | 2,586  | -              |

172

173 **Figure legends**

174 **Fig. 1.** Hi-C interaction heatmap for *B. Splendens* reference genome, showing  
 175 interactions between the 21 chromosomes.

176

177 **Fig. 2.** Collinear relationship between *B. splendens* and *Oryzias latipes*. Green represents  
 178 the chromosomes of *B. splendens* and the other multicolor represent the chromosomes of  
 179 *O. latipes*.

180

181 **Fig. 3.** Five gene families with prominent expansion in *B. splendens* when compared with  
 182 other species.

183

1  
2  
3  
4 184 **Fig. 4.** The gene phylogenetic tree of NLRP3 gene family (KO: K12800) using the genes  
5  
6 185 of *B. splendens* and other species. Clade 1 and clade 2 show two prominent expansion  
7  
8 186 sub-families of *B. splendens*.  
9

10 187  
11  
12  
13 188 **References**  
14

- 15 189 1. Chen, Y. *et al.* SOAPnuke: a MapReduce acceleration-supported software for  
16 190 integrated quality control and preprocessing of high-throughput sequencing data.  
17 191 *GigaScience* **7**, 1-6 (2018).  
18 192 2. Luo, R. *et al.* SOAPdenovo2: an empirically improved memory-efficient short-  
19 193 read de novo assembler. *Gigascience* **1**, 18 (2012).  
20 194 3. Durand, N.C. *et al.* Juicer Provides a One-Click System for Analyzing Loop-  
21 195 Resolution Hi-C Experiments. *Cell Syst* **3**, 95-8 (2016).  
22 196 4. Servant, N. *et al.* HiC-Pro: an optimized and flexible pipeline for Hi-C data  
23 197 processing. *Genome Biol* **16**, 259 (2015).  
24 198 5. Belton, J.M. *et al.* Hi-C: a comprehensive technique to capture the conformation  
25 199 of genomes. *Methods* **58**, 268-76 (2012).  
26 200 6. Dudchenko, O. *et al.* De novo assembly of the *Aedes aegypti* genome using Hi-C  
27 201 yields chromosome-length scaffolds. *Science* **356**, 92-95 (2017).  
28 202 7. Xu, Z. & Wang, H. LTR\_FINDER: an efficient tool for the prediction of full-  
29 203 length LTR retrotransposons. *Nucleic Acids Res* **35**, W265-8 (2007).  
30 204 8. Tarailo-Graovac, M. & Chen, N. Using RepeatMasker to identify repetitive  
31 205 elements in genomic sequences. *Curr Protoc Bioinformatics* **Chapter 4**, Unit 4  
32 206 10 (2009).  
33 207 9. Jurka, J. *et al.* Repbase Update, a database of eukaryotic repetitive elements.  
34 208 *Cytogenet Genome Res* **110**, 462-7 (2005).  
35 209 10. Stanke, M. *et al.* AUGUSTUS: ab initio prediction of alternative transcripts.  
36 210 *Nucleic Acids Res* **34**, W435-9 (2006).  
37 211 11. Burge, C. & Karlin, S. Prediction of complete gene structures in human genomic  
38 212 DNA. *J Mol Biol* **268**, 78-94 (1997).  
39 213 12. Birney, E. GeneWise and Genomewise. *Genome Research* **14**, 988-995 (2004).  
40 214 13. Trapnell, C. *et al.* Differential gene and transcript expression analysis of RNA-seq  
41 215 experiments with TopHat and Cufflinks. *Nature Protocols* **7**, 562-578 (2012).  
42 216 14. Elsik, C.G. *et al.* Creating a honey bee consensus gene set. *Genome Biol* **8**, R13  
43 217 (2007).  
44 218 15. Kasahara, M. *et al.* The medaka draft genome and insights into vertebrate genome  
45 219 evolution. *Nature* **447**, 714-719 (2007).  
46 220 16. Howe, K. *et al.* The zebrafish reference genome sequence and its relationship to  
47 221 the human genome. *Nature* **496**, 498-503 (2013).  
48 222 17. Kanehisa, M. The KEGG Database. **247**, 91-103 (2002).  
49 223 18. Hirota, S.A. *et al.* NLRP3 inflammasome plays a key role in the regulation of  
50 224 intestinal homeostasis. *Inflammatory Bowel Diseases* **17**, 1359-1372 (2011).  
51  
52  
53  
54  
55  
56  
57  
58  
59  
60  
61  
62  
63  
64  
65

1  
2  
3  
4  
5  
6  
7  
8  
9  
10  
11  
12  
13  
14  
15  
16  
17  
18  
19  
20  
21  
22  
23  
24  
25  
26  
27  
28  
29  
30  
31  
32  
33  
34  
35  
36  
37  
38  
39  
40  
41  
42  
43  
44  
45  
46  
47  
48  
49  
50  
51  
52  
53  
54  
55  
56  
57  
58  
59  
60  
61  
62  
63  
64  
65

225 19. Li, H. & Durbin, R. Fast and accurate short read alignment with Burrows-Wheeler  
226 transform. *Bioinformatics* **25**, 1754-1760 (2009).  
227 20. McKenna, A. *et al.* The Genome Analysis Toolkit: A MapReduce framework for  
228 analyzing next-generation DNA sequencing data. *Genome Research* **20**, 1297-  
229 1303 (2010).  
230

Fig.1

[Click here to download Figure](#)

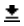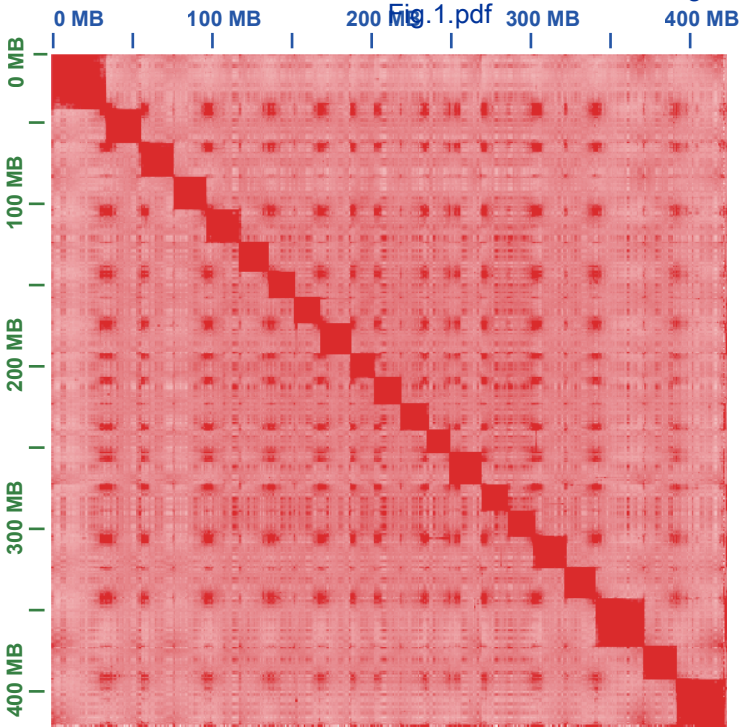

Fig.2

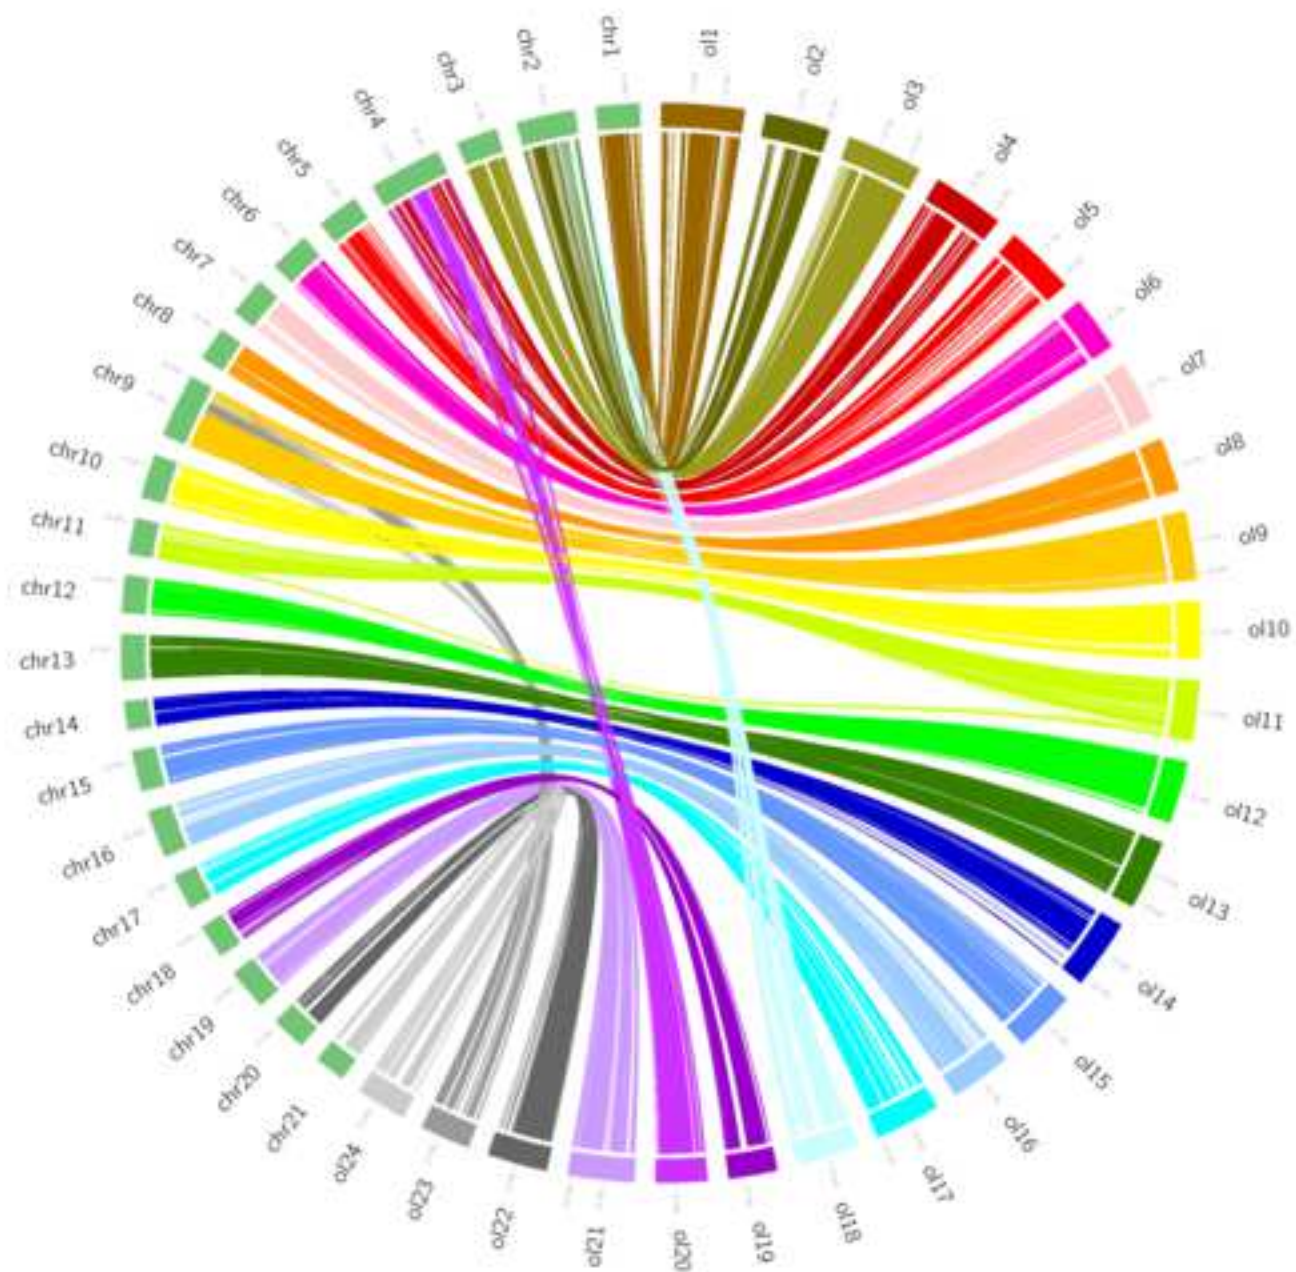

Fig.3

[Click here to download Figure](#)

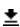

cfa  
ctr  
cge  
chx  
ecb  
fca  
hgl  
mcc  
mcf  
ngi  
nte  
pon  
ptr  
rno  
pale  
phi  
oas  
clv  
rro  
ocu  
cjc  
pps  
blo  
aec  
aag  
aga  
ame  
bmor  
bmy  
cbr  
cel  
cfo  
cqu  
dahn  
der  
dgr  
dme  
dmo  
dpe  
dpo  
dse  
dsi  
dwi  
dya  
hmg  
hst  
loa  
mde  
nve  
nyi  
phu  
soc  
tca  
xla  
aqu  
isc  
tsp  
umr  
ptg  
bacu  
mdo  
cin  
tad  
spu  
pxy  
apl  
smm  
pro  
lgi  
crg  
tab  
ccw  
gfr  
gga  
ggo  
hsa  
lve  
mgp  
mhu  
myb  
myd  
oaa  
phd  
shr  
tgu  
tgg  
tch  
ssc  
acs  
apla  
bom  
aml  
tup  
xtr  
pbi  
dre  
pss  
mze  
ola  
tru  
xma  
asn  
amj  
cmj  
lcm  
cmk

fightfish

K12800  
K12023  
K05016  
K04228  
K12047

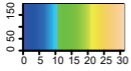







Click here to access/download  
**Supplementary Material**  
Supplementary material.docx



Supplement: giy087_giga-d-18-00046_original_submission.pdf [file giy087_giga-d-18-00046_original_submission.pdf]
